# Supplementary material
Source: PubMed Central journal article supplement (PMC3704948)

**Genetic induction of phosphate toxicity significantly reduces the survival of hypercholesterolemic obese mice**

**Mutsuko Ohnishi, Shigeko Kato, M. Shawkat Razzaque**

Department of Oral Medicine, Infection and Immunity, Harvard School of Dental  
Medicine, Boston, MA 02115, USA

Suppl. Figure 1.

**Gross phenotype of the *ob/ob* mice.** Body weight chart of wild-type (WT) and *ob/ob* mice. The *ob/ob* mice were significantly larger compared to controls (**upper panel**). By 9 weeks, a massive accumulation of abdominal fat was observed in the *ob/ob* mice compared to the WT mice (**lower panel**) [23].

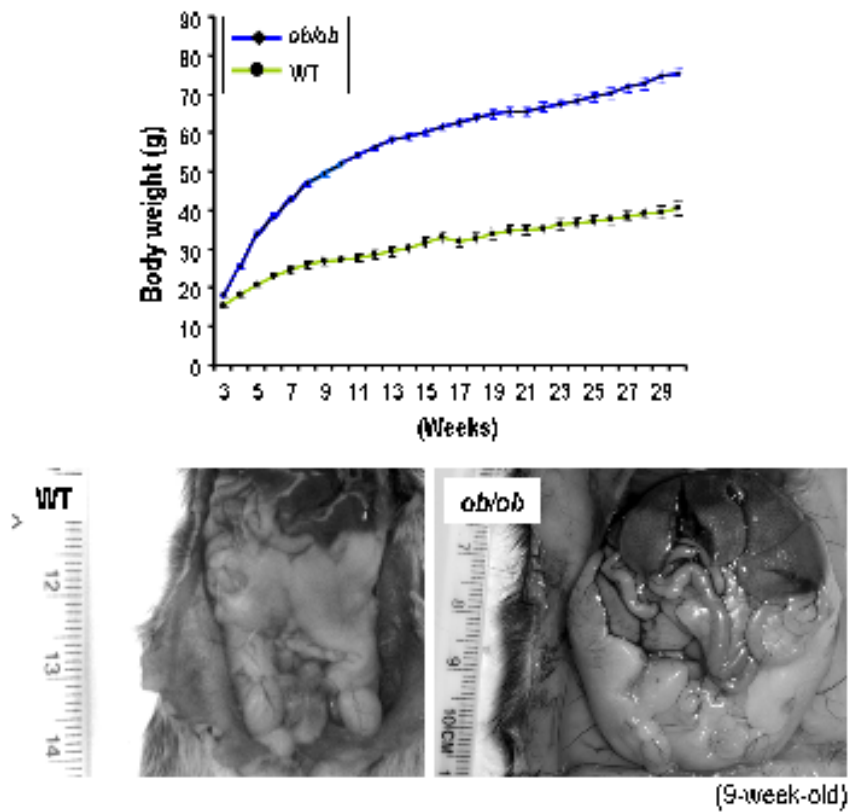

**Suppl. Figure 2.**

**Skin histology.** Compared to the skin of the wild-type (WT) mice, there was an increase in the subcutaneous fat tissue layer present in all three mutant mice (*ob/ob*, *ob/ob-klotho*<sup>-/-</sup> and *ob/ob-1 $\alpha$ (OH)ase*<sup>-/-</sup>); however, the *ob/ob-klotho*<sup>-/-</sup> mice had relatively less fat tissue (represented as a bar) (10x magnification).

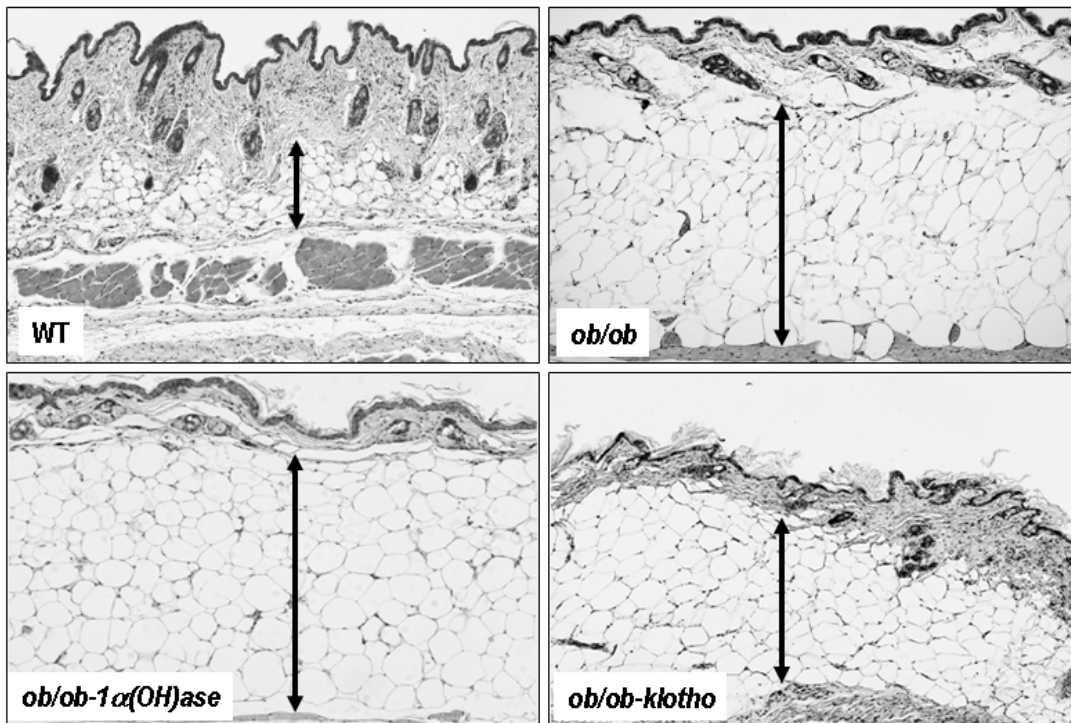

**Suppl. Figure 3.**

**Gross appearance of the spleens and testes in the mouse models.** The testes and spleens were collected from wild-type (WT), *ob/ob*, *ob/ob-klotho*<sup>-/-</sup> and *ob/ob-1 $\alpha$ (OH)ase*<sup>-/-</sup> mice. Compared to the *ob/ob* and *ob/ob-1 $\alpha$ (OH)ase*<sup>-/-</sup> mice, the spleens were smaller in hyperphosphatemic *ob/ob-klotho*<sup>-/-</sup> mice. The animals were age-matched (11 weeks; **upper panel**). The testes from hyperphosphatemic *ob/ob-klotho*<sup>-/-</sup> mice were smaller than those from the *ob/ob* or *ob/ob-1 $\alpha$ (OH)ase*<sup>-/-</sup> mice (**lower panel**).

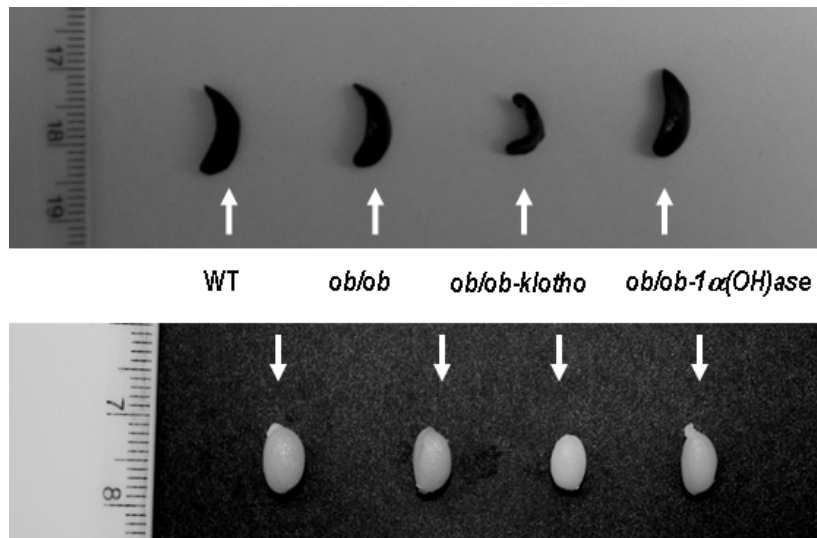

**Suppl. Figure 4.**

**Lung tissue histology.** Hematoxylin and eosin-stained sections of the lung tissues from 6-week-old wild-type (WT), *ob/ob*, *ob/ob-klotho*<sup>-/-</sup> and *ob/ob-1 $\alpha$ (OH)ase*<sup>-/-</sup> mice. Compared to the WT mice, there was marked expansion of alveolar spaces (emphysema) in the hyperphosphatemic *ob/ob-klotho*<sup>-/-</sup> mice. Similar changes were not observed in the *ob/ob-1 $\alpha$ (OH)ase*<sup>-/-</sup> mice (20x magnification).

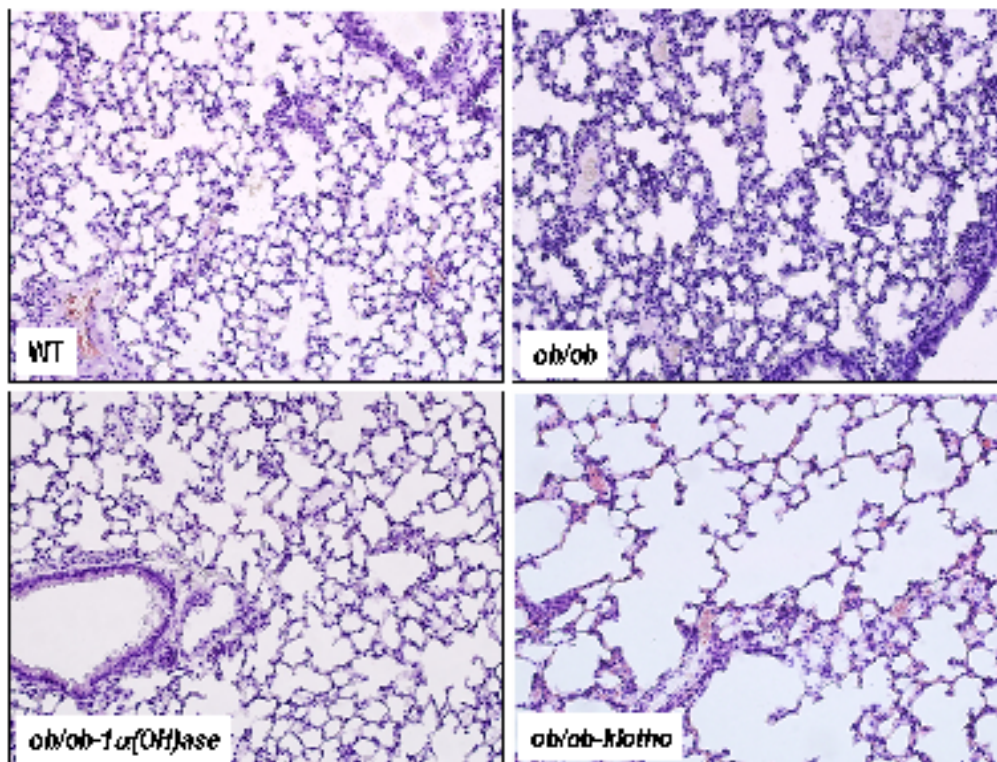

**Suppl. Figure 5.**

**Survival plot.** Survival analysis of wild-type (WT) (n=10), *ob/ob* (n=10), *ob/ob-klotho*<sup>-/-</sup> (n=11) and *ob/ob-1 $\alpha$ (OH)ase*<sup>-/-</sup> (n=10) mice. The survival time of hyperphosphatemic *ob/ob-klotho*<sup>-/-</sup> mice was reduced compared to the *ob/ob* or *ob/ob-1 $\alpha$ (OH)ase*<sup>-/-</sup> mice. All the *ob/ob-klotho*<sup>-/-</sup> mice died by 20 weeks, while none of the WT, *ob/ob* or *ob/ob-1 $\alpha$ (OH)ase*<sup>-/-</sup> mice died within the 25 week observation period [23].

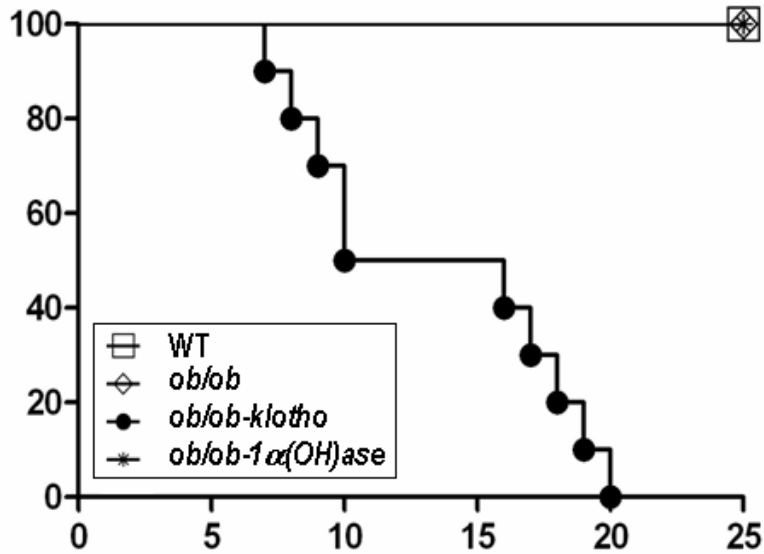

Supplement: NIHMS333964-supplement-01.pdf [file NIHMS333964-supplement-01.pdf]
